# Supplementary material
Source: PubMed Central journal article supplement (PMC6736738)
Supplement: NIHMS1532637-supplement-2.pdf [file NIHMS1532637-supplement-2.pdf]

## SUPPLEMENTAL FIGURES

Figure S1 – related to Figure 1

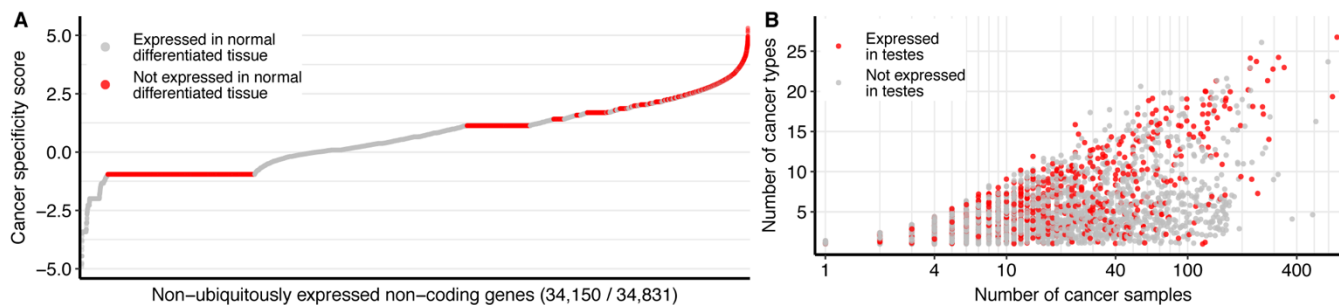

**Figure S1 – related to Figure 1. Cancer specificity of non-coding genes.**

(A) As Fig. 1A, but for non-coding genes that are not expressed in all tissue types.

(B) As Fig. 1C, but for non-coding genes.

**Figure S2 – related to Figure 2**

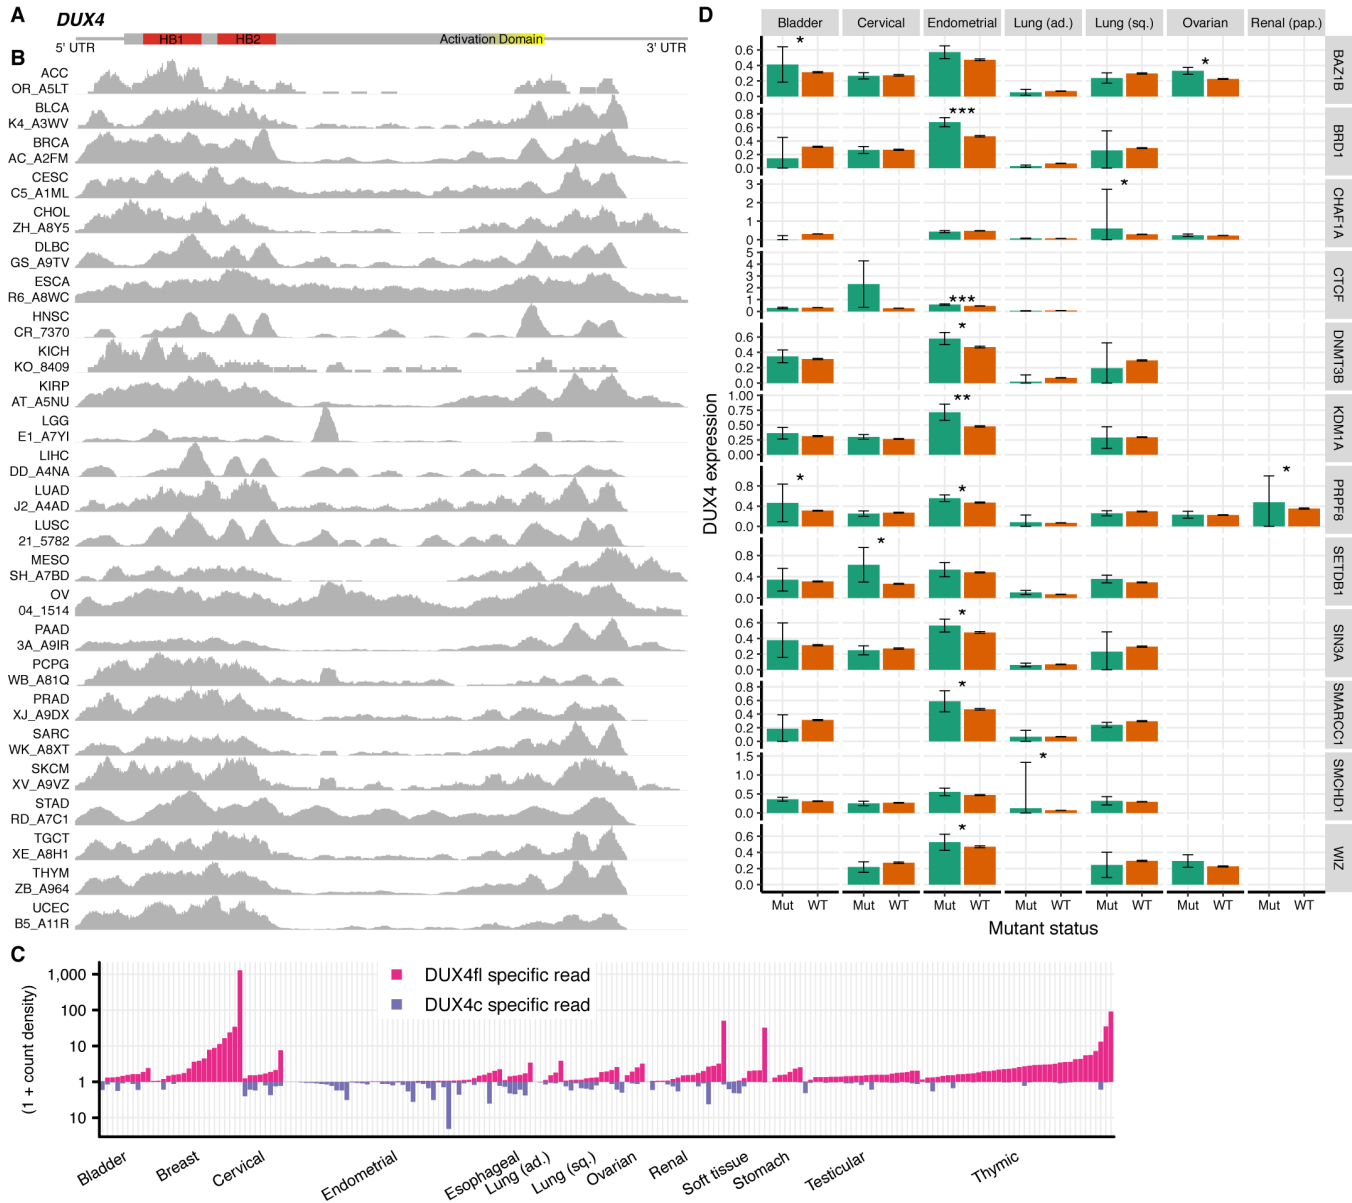

**Figure S2 – related to Figure 2. DUX4 is expressed as a full-length mRNA in solid cancers.**

(A) Schematic of DUX4 isoform that encodes the full-length transcription factor. Red, sequence encoding the DNA-binding homeodomains (HB1 and HB2); yellow, sequence encoding the C-terminal activation domain.

(B) As Fig. 2C, but including data from additional representative DUX4+ samples from each analyzed cancer type.

(C) Counts of RNA-seq reads mapping uniquely to the DUX4 mRNA encoding the full-length transcription factor (DUX4fl) or the DUX4C mRNA (DUX4c). Plot restricted to DUX4+ samples in cancer types with  $\geq 5$  DUX4+ samples.

(D) Median DUX4 mRNA levels (TPM) in cancer samples with (Mut) or without (WT) predicted loss-of-function mutations affecting the indicated genes. \*/\*\*/\*\*\*,  $p < 0.05/0.01/0.001$  by the one-sided Mann-Whitney U test. See also Fig. 2G. Error bars, standard deviations estimated by bootstrapping. TPM, transcripts per million.

**Figure S3 – related to Figure 3**

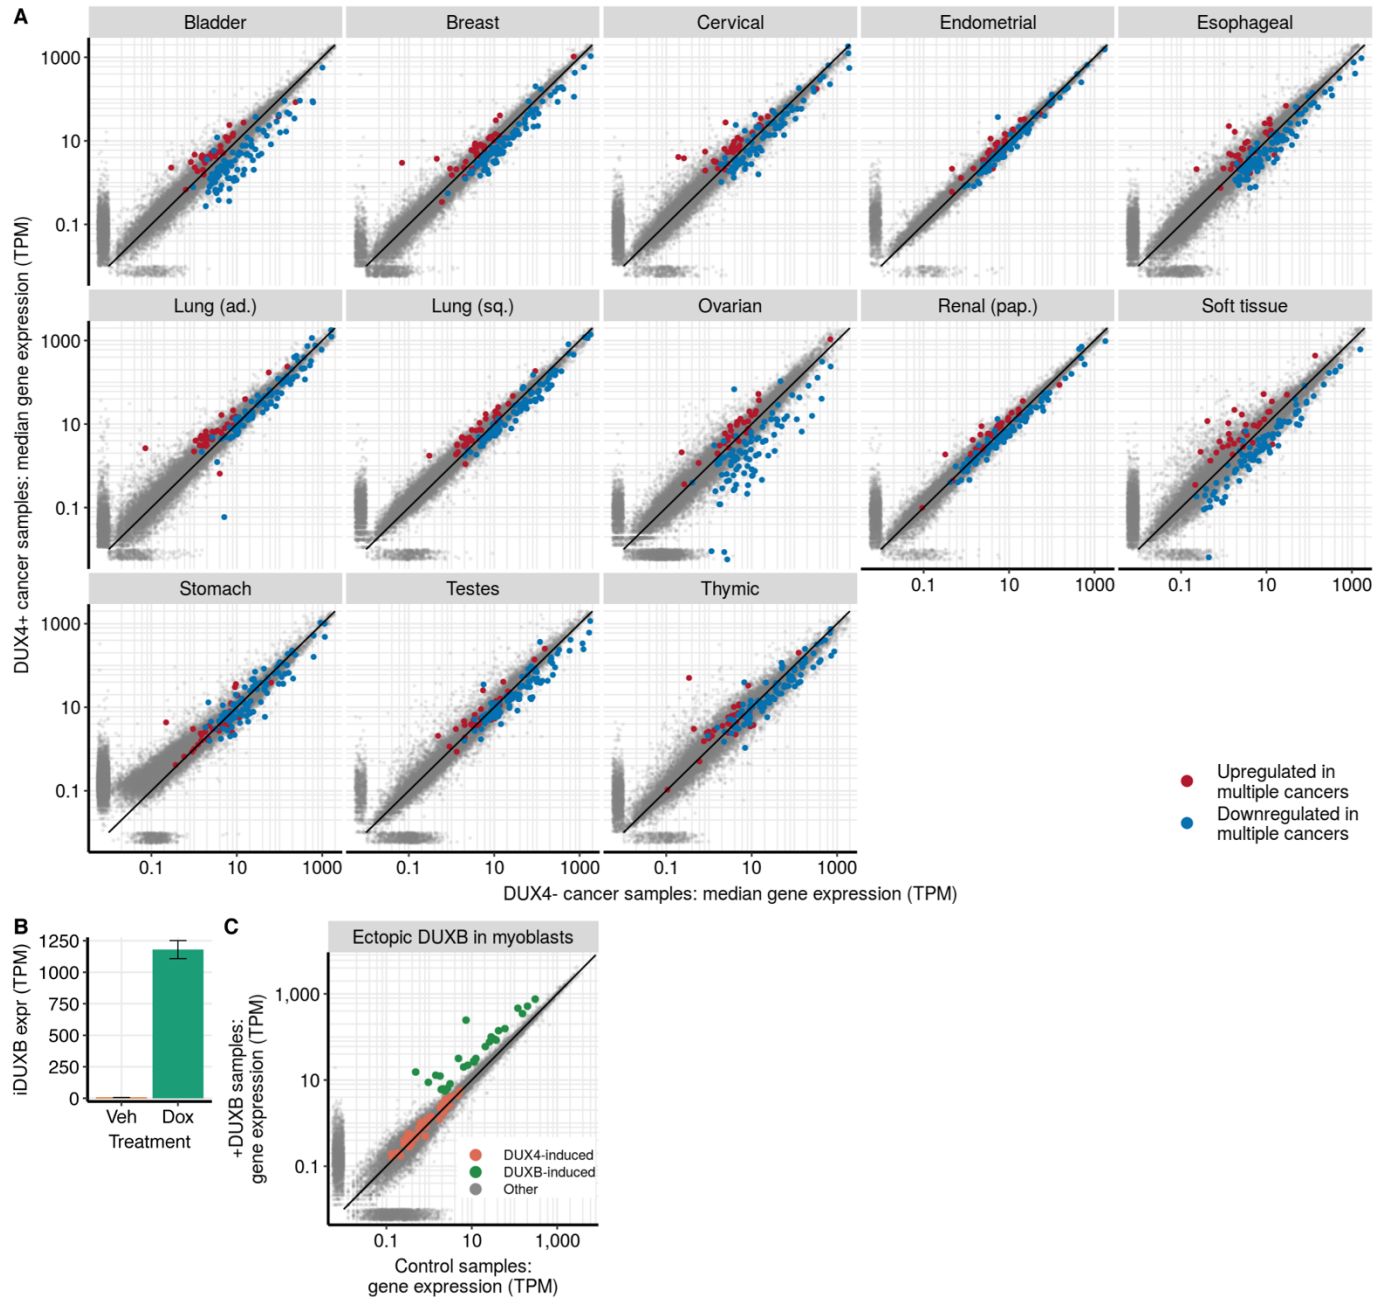

**Figure S3 – related to Figure 3. DUX4 expression is associated with decreased immune activity.**

(A) Scatter plots of median gene expression of DUX4- and DUX4+ samples. Differentially expressed genes that are up- and down-regulated in DUX4+ samples in multiple ( $\geq 8$ ) cancers are indicated in red and blue, respectively.

(B) Mean levels of DUXB mRNA following treatment of MB135 myoblasts engineered to contain a doxycycline-inducible *DUXB* expression construct with vehicle (Veh, water) or doxycycline (Dox) for 24 hours. Error bars, upper and lower values from two biological replicates.

(C) Differentially expressed genes in myoblasts treated with vehicle or doxycycline to induce *DUXB* expression. Red, high-confidence DUX4-induced genes (from **Fig. 3A**). Green, DUXB-induced genes based on this analysis, defined as genes exhibiting a fold-change of  $>2$  and associated Bayes factor  $> 10$  in both biological replicates. TPM, transcripts per million.

**Figure S4 – related to Figure 4**

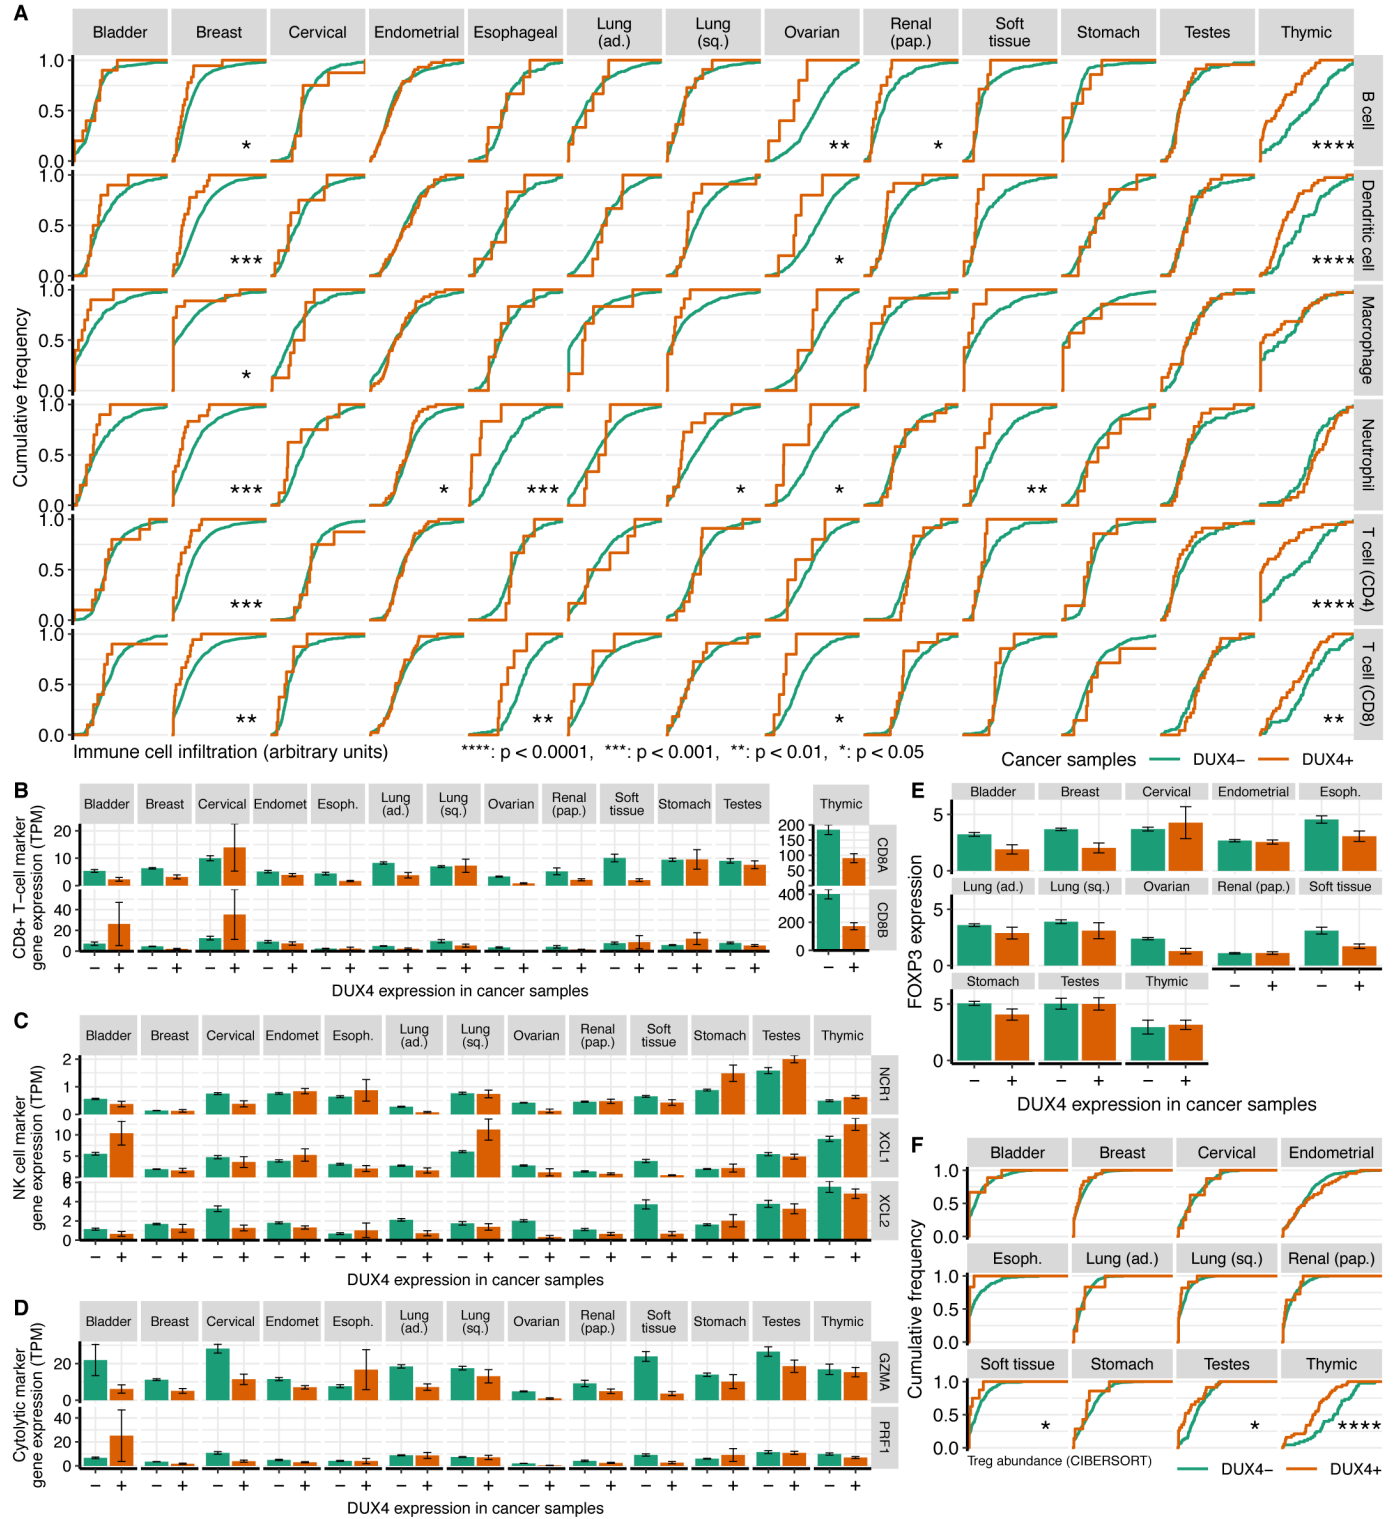

**Figure S4 – related to Figure 4. DUX4+ cancers exhibit reduced immune cell infiltration.**

(A) Estimated infiltration of different immune cell types in DUX4- and DUX4+ cancers, where infiltration was estimated with the TIMER method (Li et al., 2017). \*\*\*/\*\*\*,  $p < 0.05/0.01/0.001$  by the one-sided Mann-Whitney U test.

(B) Mean mRNA levels of the indicated markers of CD8+ T cells in DUX4- and DUX4+ cancers. Error bars, standard deviation of the mean estimated by bootstrapping.

(C) As (B), but illustrating NK cell markers.

(D) As (B), but illustrating *GZMA* and *PRF1* expression. See also **Fig. 4C**.

(E) As (B), but illustrating *FOXP3* expression.

(F) Estimated infiltration of regulatory T cells in DUX4- and DUX4+ cancers as estimated by CIBERSORT (Newman et al., 2015). \*\*\*/\*\*\*,  $p < 0.05/0.01/0.001$  by the one-sided Mann-Whitney U test.

**Figure S5 – related to Figure 5**

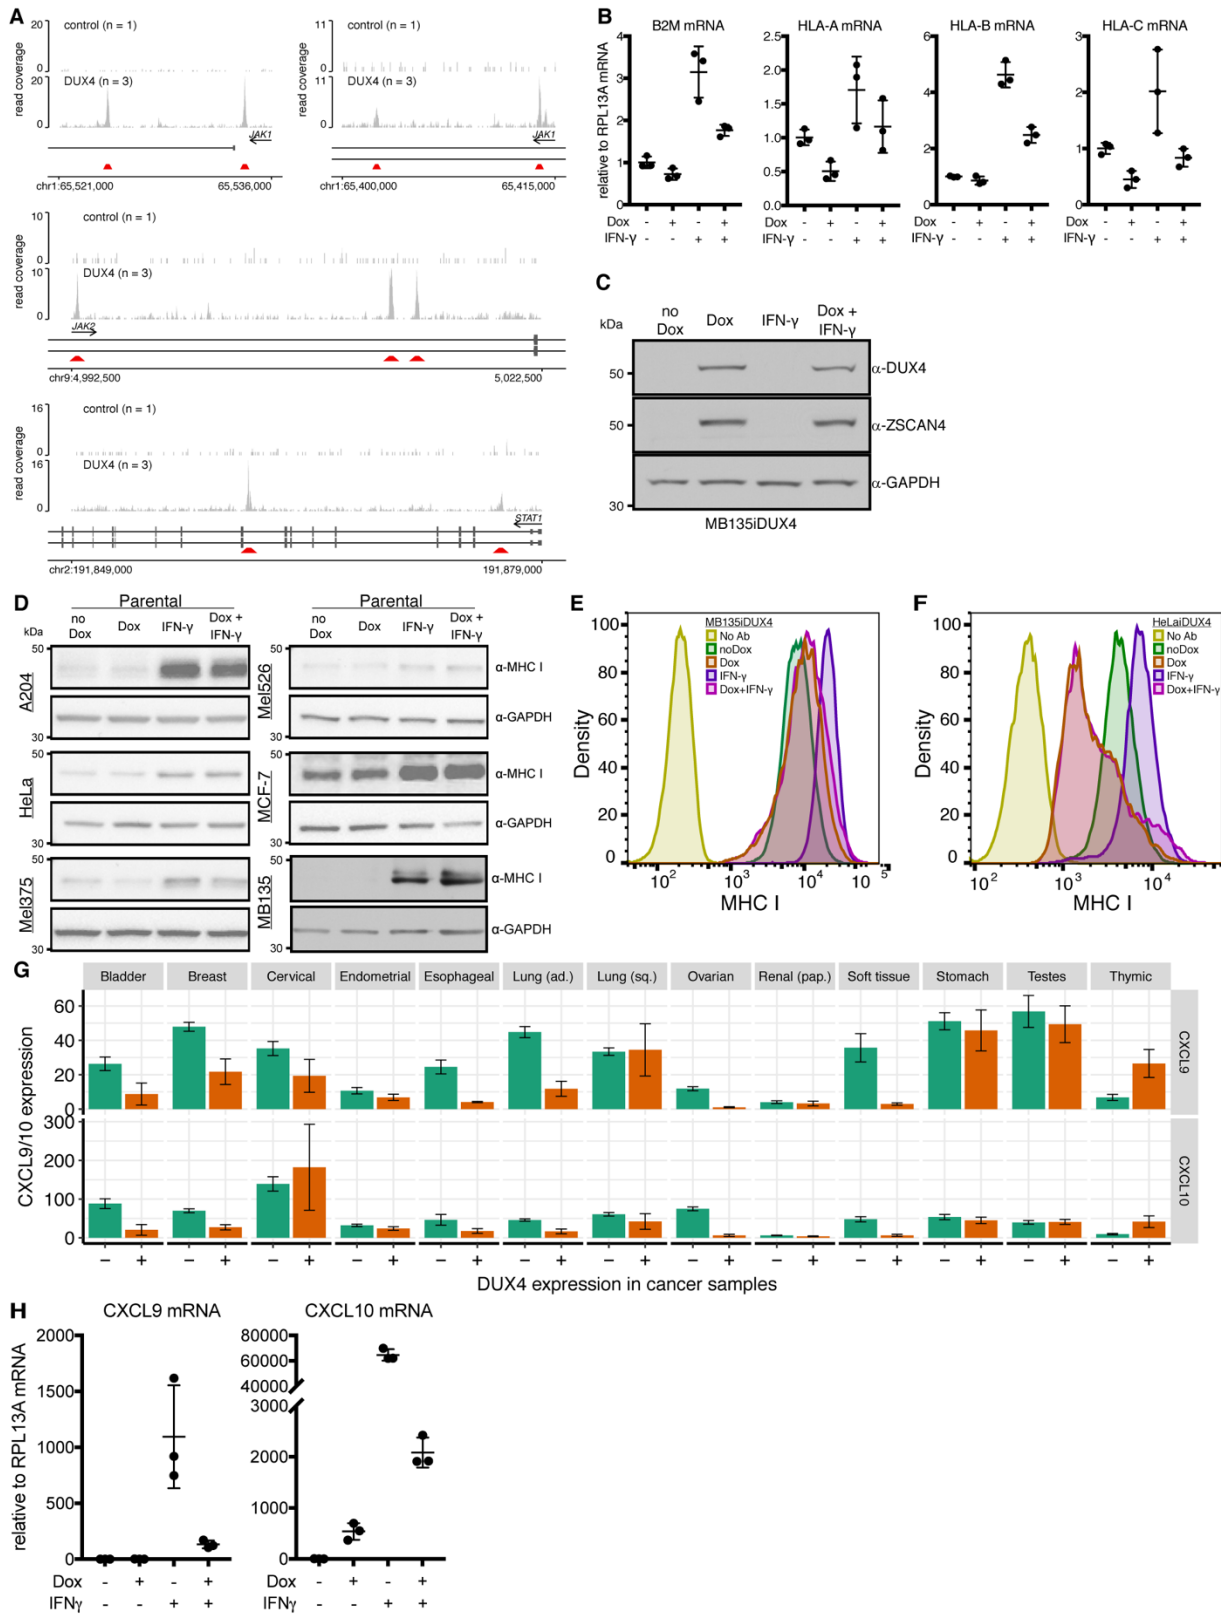

**Figure S5 – related to Figure 5. DUX4 blocks interferon- $\gamma$ -mediated induction of MHC Class I.**

(A) Read coverage from DUX4 ChIP-seq experiments following acute *DUX4* expression in cultured myoblasts (Geng et al., 2012). Red blocks indicate peaks called with MACS (Zhang et al., 2008). n, number of replicates.

(B) Levels of B2M, HLA-A, HLA-B, and HLA-C mRNA following treatment of MB135iDUX4 with IFN- $\gamma$  and/or doxycycline (Dox) to induce DUX4. Error bars, standard deviation across biological replicates.

(C) Levels of DUX4, ZSCAN4, and GAPDH protein following treatment of MB135iDUX4 cells with interferon- $\gamma$  (IFN- $\gamma$ ) and/or doxycycline (Dox) to induce DUX4.

(D) Levels of MHC Class I and GAPDH protein following treatment of the indicated parental cell lines (without an inducible DUX4 construct) with interferon- $\gamma$  (IFN- $\gamma$ ) and/or doxycycline (Dox).  $\alpha$ -MHC I, pan-MHC Class I probe. These data serve as a control for **Fig. 5D-I** to confirm that doxycycline treatment alone does not block interferon- $\gamma$ -mediated induction of MHC Class I.

(E) As Fig. 5J, but including the no antibody control (No Ab).

(F) As Fig. 5K, but including the no antibody control (No Ab).

(G) Mean CXCL9 and CXCL10 mRNA levels in DUX4- and DUX4+ cancers. Error bars, standard deviation of the mean estimated by bootstrapping.

(H) As (B), but illustrating CXCL9 and 10 mRNA levels.
